# Supplementary material for: Synthesis of gold nanoparticles within a supramolecular gel-phase network
Source: Royal Society of Chemistry journal article supplement (doi:10.1039/b418190e), 2005-01-01
Supplement: b418190e.pdf [file b418190e.pdf]

## Synthesis of Gold Nanoparticles Within a Supramolecular Gel-Phase Network

Christine S. Love,<sup>a</sup> Victor Chechik,<sup>\*a</sup> David K. Smith,<sup>\*a</sup> Karen Wilson,<sup>a</sup> Ian Ashworth<sup>b</sup>  
and Colin Brennan<sup>b</sup>

### Supplementary Information

#### TEM Analysis of Nanoparticle Diameters

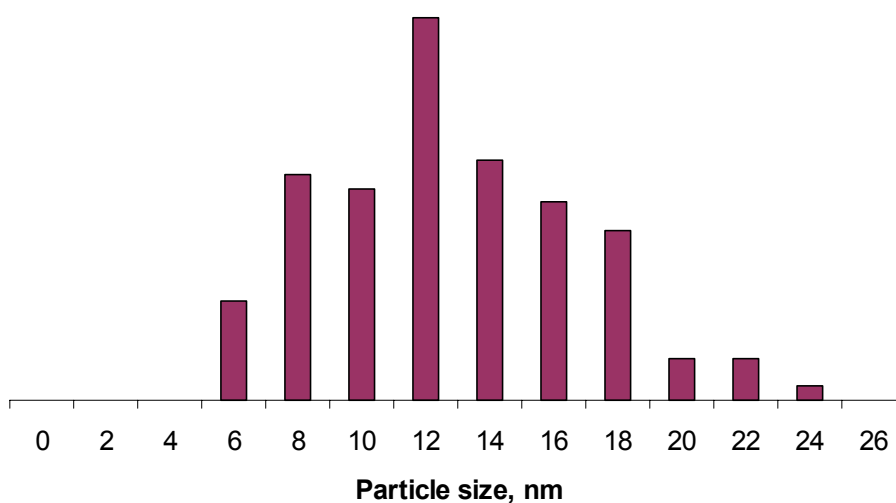

**Figure 1 (Supplementary):** Histogram of nanoparticle sizes. Total number of particles sampled = 117. Mean particle size = 13 nm.

### XPS Analysis

XPS spectra were recorded on a Kratos AXIS HSi instrument equipped with a Mg  $K_{\alpha}$  X-Ray source (1253.6 eV) and a charge neutraliser. Spectra were recorded at normal emission using a 20 eV analyser pass energy and 144W X-Ray power. Two point energy scale referencing was made using adventitious C (284.5 eV) and valence band energy corrections.

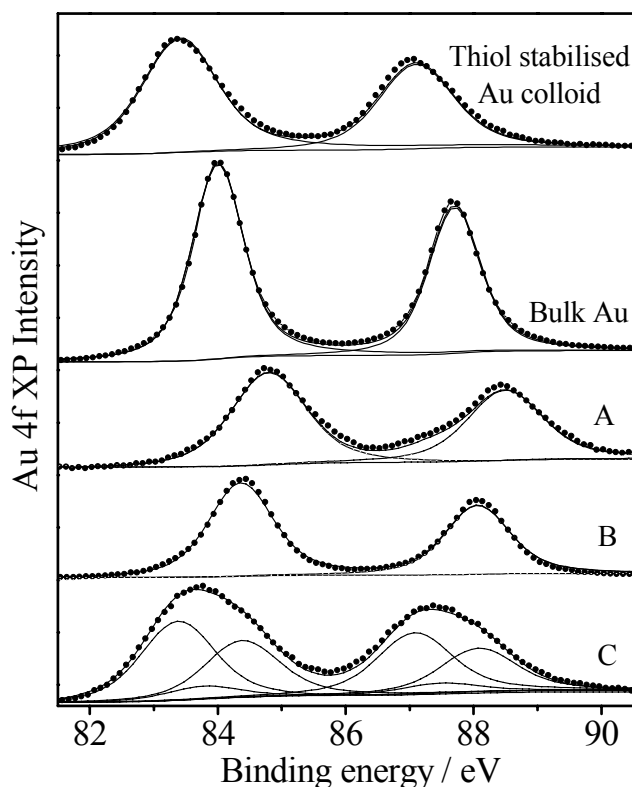

**Figure 2 (Supplementary):** Au 4f XPS spectra for bulk and colloidal Au reference samples and gel stabilised Au nanoparticles (A) Au(III), (B) Au (I) following initial UV irradiation, (C) Au nanoparticles following extended irradiation.
